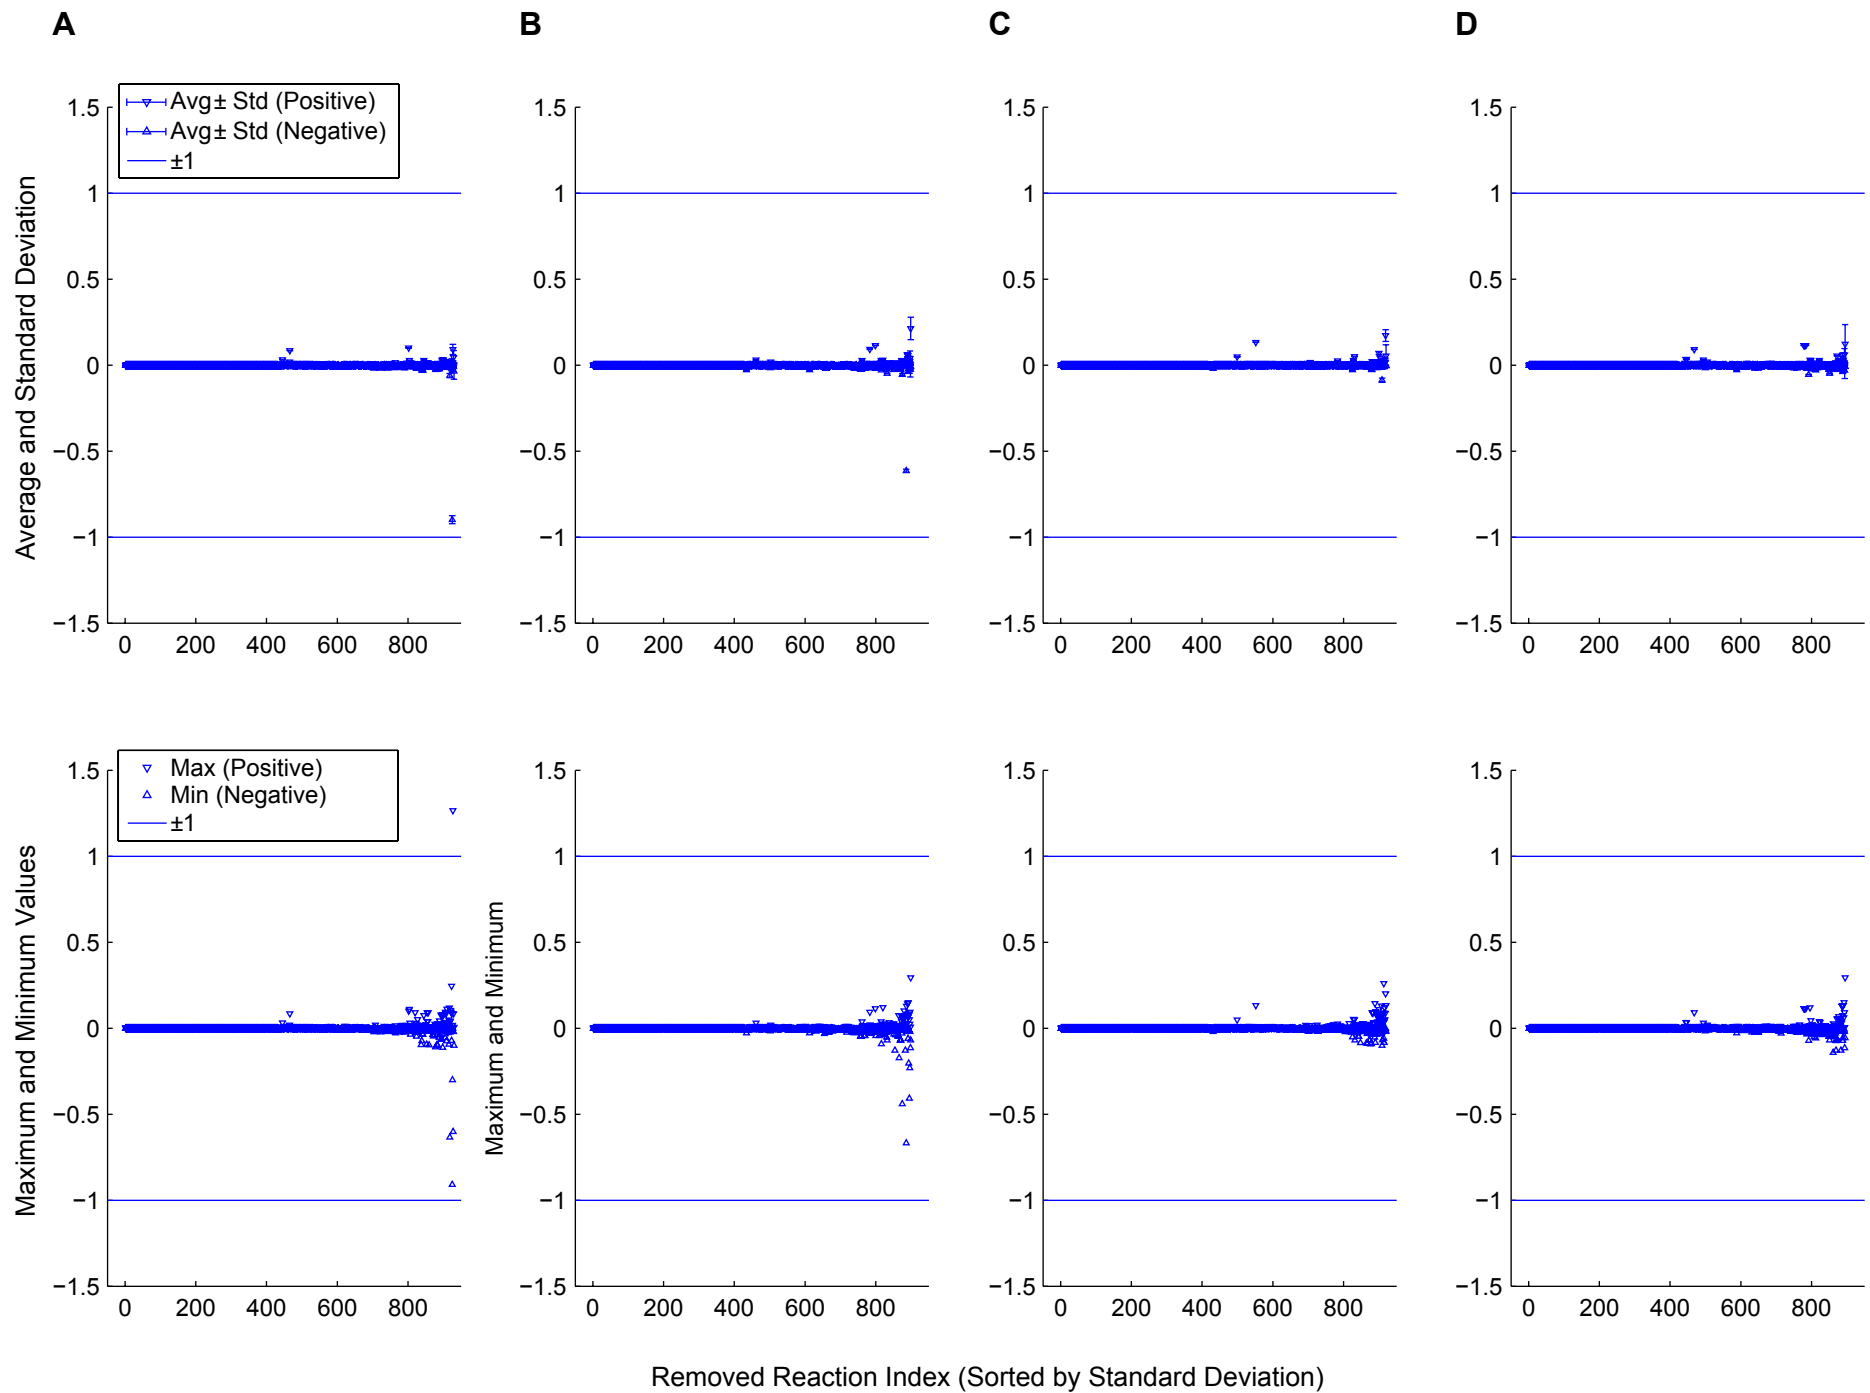

Source: https://storage.googleapis.com/plos-corpus-prod/10.1371/journal.pone.0024162/1/pone.0024162.s001.pdf?X-Goog-Algorithm=GOOG4-RSA-SHA256&X-Goog-Credential=wombat-sa%40plos-prod.iam.gserviceaccount.com%2F20210118%2Fauto%2Fstorage%2Fgoog4_request&X-Goog-Date=20210118T164540Z&X-Goog-Expires=3600&X-Goog-SignedHeaders=host&X-Goog-Signature=b973c0d2e6912995bfcd087752f8e50da5efca1f549fe12d605790370b4461cfaa241e6e1505f210698a33b8cc814c57a72940c5f8b8f4436b2ec6ef629bc959d07bca3098755533ddf8bcd65317d6595822ad51037af0d3e576fe39696e2efb860609c3228de2e47293d8ca515c91de5d0a8aabd8851b461a0a46e873a08bbf332c041e348545e6dd391511318949e6dca63a660303303e43393f53d7309f642dad484c6c3ef3899b0a1486a690adfbb219c2892194c87fdc33444791501f1b73b73311f5145fb880287e6df8773814bb3b1d3bb7d3e70c5c9d380df42cc41bf5fff4cc32218b8a4ef9376133f0ad6eedfcb7b74b3011d92c8eb61b24e795d8
