# Supplementary material for: Large-Scale Bi-Level Strain Design Approaches and Mixed-Integer Programming Solution Techniques
Source: PLoS One. 2011 Sep 9;6(9):e24162. doi: 10.1371/journal.pone.0024162 (PMC3175644; doi:10.1371/journal.pone.0024162)
Supplement: Table S1 — List of reaction changes to the universal database. This table includes the list of reactions removed in this study from the original universal database (reported in [21]). (XLSX) [file pone.0024162.s004.xlsx]

## Sheet: Sheet1
List of Removed Reactions from the Universal Database (Pharyka et al. (2005) Genome Res)
Inactive in Glucose Aerobic Condition	Present in iJR904	Manually Excluded
R00015	R05086	R00011
R00019	R01648	R00017
R00022	R00238	R00033
R00023	R00920	R00072
R00025	R02649	R00078
R00027	R00315	R00085
R00029	R01811	R00090
R00032	R01324	R00092
R00034	R02283	R00094
R00036	R00235	R00095
R00038	R00127	R00113
R00039	R00089	R00116
R00043	R01083	R00120
R00044	R04559	R00121
R00045	R02059	R00136
R00048	R01157	R00137
R00049	R03443	R00190
R00053	R00192	R00200
R00054	R00194	R00206
R00055	R04560	R00207
R00058	R00401	R00208
R00059	R00258	R00211
R00062	R02422	R00212
R00063	R01540	R00243
R00070	R03231	R00250
R00073	R00182	R00264
R00074	R01761	R00267
R00075	R01086	R00272
R00080	R02291	R00273
R00083	R00485	R00274
R00084	R00480	R00279
R00091	R00481	R00289
R00097	R00490	R00302
R00099	R00355	R00303
R00106	R00188	R00343
R00107	R00009	R00344
R00109	R01492	R00345
R00117	R01715	R00346
R00119	R01714	R00351
R00128	R00362	R00352
R00129	R00510	R00354
R00132	R01286	R00357
R00139	R00512	R00359
R00140	R01665	R00360
R00180	R01547	R00366
R00186	R02735	R00396
R00187	R02090	R00402
R00193	R04441	R00415
R00195	R01012	R00430
R00213	R01504	R00431
R00218	R02237	R00447
R00219	R03084	R00465
R00223	R03083	R00466
R00240	R01658	R00468
R00270	R02094	R00473
R00276	R02483	R00475
R00293	R02036	R00500
R00301	R00658	R00502
R00310	R00749	R00533
R00318	R00762	R00556
R00321	R03163	R00565
R00322	R02262	R00572
R00324	R00310	R00578
R00327	R00304	R00584
R00340	R00844	R00602
R00348	R00765	R00604
R00363	R00835	R00605
R00368	R05608	R00608
R00370	R03033	R00610
R00398	R01101	R00614
R00416	R00768	R00619
R00418	R00332	R00642
R00421	R02754	R00643
R00445	R02752	R00644
R00446	R00239	R00645
R00452	R00248	R00648
R00460	R00256	R00659
R00461	R00888	R00675
R00463	R05647	R00677
R00470	R02003	R00689
R00474	R01918	R00700
R00477	R01482	R00705
R00486	R01983	R00709
R00498	R05615	R00710
R00499	R03013	R00711
R00504	R00084	R00713
R00518	R04376	R00715
R00532	R01394	R00717
R00535	R01775	R00718
R00536	R01777	R00724
R00537	R01717	R00726
R00554	R03037	R00729
R00562	R00479	R00740
R00563	R03457	R00742
R00564	R01127	R00743
R00574	R01130	R00746
R00580	R01123	R00754
R00603	R04001	R00756
R00612	R03351	R00758
R00622	R03350	R00763
R00649	R01100	R00764
R00653	R00704	R00767
R00656	R00772	R00769
R00664	R04424	R00770
R00666	R00409	R00774
R00679	R00342	R00781
R00681	R00214	R00783
R00682	R00216	R00800
R00683	R00946	R00806
R00685	R01016	R00819
R00687	R01185	R00830
R00693	R02765	R00834
R00702	R05606	R00836
R00723	R01226	R00842
R00735	R01401	R00845
R00739	R04420	R00846
R00777	R00118	R00848
R00778	R00330	R00850
R00787	R00156	R00868
R00789	R00570	R00870
R00799	R02093	R00919
R00804	R01857	R00932
R00809	R02331	R00936
R00810	R02326	R00943
R00812	R01137	R00948
R00814	R02322	R00966
R00818	R01268	R00975
R00820	R04150	R00977
R00827	R02102	R00978
R00828	R02719	R00980
R00838	R01126	R00999
R00853	R00963	R01011
R00854	R01664	R01019
R00863	R00511	R01022
R00871	R01569	R01034
R00874	R02088	R01041
R00880	R00183	R01049
R00888	R01968	R01053
R00889	R01227	R01058
R00903	R02601	R01063
R00906	R01870	R01070
R00909	R00707	R01087
R00912	R02539	R01092
R00913	R05630	R01093
R00922	R00209	R01098
R00942	R00278	R01112
R00953	R02613	R01116
R00956	R02060	R01128
R00960	R01513	R01132
R00969	R00771	R01138
R00973	R01512	R01143
R00979	R01334	R01150
R00984	R01518	R01151
R00989	R00694	R01158
R00998	R04509	R01203
R01000	R00341	R01212
R01014	R02749	R01220
R01020	R03509	R01221
R01031	R04037	R01228
R01032	R04640	R01251
R01033	R03460	R01257
R01043	R00582	R01271
R01047	R00921	R01274
R01050	R00230	R01276
R01055	R01155	R01277
R01076	R01561	R01282
R01077	R02557	R01294
R01089	R02147	R01295
R01091	R01969	R01296
R01096	R01863	R01299
R01099	R02748	R01302
R01104	R02297	R01371
R01109	R00277	R01373
R01110	R00173	R01379
R01121	R01876	R01388
R01144	R00066	R01392
R01145	R05850	R01398
R01149	R02437	R01415
R01153	R02263	R01441
R01159	R01529	R01442
R01160	R01056	R01446
R01172	R04594	R01469
R01173	R05645	R01481
R01177	R02734	R01505
R01180	R04475	R01516
R01186	R03595	R01521
R01187	R00586	R01522
R01188	R00221	R01525
R01189	R00220	R01528
R01190	R00411	R01538
R01191	R04992	R01575
R01199	R04217	R01582
R01205	R00275	R01629
R01225	R04030	R01630
R01239	R00408	R01655
R01240	R00405	R01698
R01241	R00339	R01708
R01243	R02774	R01710
R01266	R02771	R01711
R01267	R00112	R01719
R01269	R04365	R01728
R01292	R00751	R01730
R01304	R01465	R01735
R01305	R00996	R01738
R01329	R01466	R01739
R01336	R01570	R01740
R01355	R02101	R01745
R01361	R00617	R01747
R01367	R00837	R01748
R01378	R02778	R01751
R01384	R00010	R01752
R01386	R00782	R01759
R01387	R00673	R01769
R01395	R02722	R01773
R01396	R00674	R01776
R01410	R00734	R01787
R01411	R00420	R01788
R01412	R00660	R01817
R01417	R00291	R01818
R01418	R00505	R01825
R01421	R00955	R01838
R01423	R04587	R01851
R01425	R00158	R01859
R01437	R03165	R01866
R01444	R02098	R01867
R01445	R01214	R01873
R01448	R01432	R01879
R01451		R01882
R01452		R01899
R01453		R01904
R01454		R01914
R01456		R01934
R01457		R01962
R01459		R01975
R01460		R01978
R01463		R01990
R01467		R01993
R01471		R02035
R01473		R02058
R01484		R02069
R01485		R02070
R01506		R02104
R01533		R02105
R01535		R02106
R01543		R02107
R01550		R02132
R01553		R02134
R01556		R02150
R01562		R02197
R01564		R02204
R01583		R02217
R01584		R02224
R01585		R02235
R01586		R02236
R01587		R02247
R01589		R02258
R01590		R02260
R01592		R02282
R01593		R02295
R01594		R02313
R01595		R02328
R01598		R02342
R01610		R02353
R01612		R02382
R01613		R02415
R01614		R02429
R01615		R02454
R01616		R02456
R01617		R02457
R01619		R02472
R01633		R02515
R01634		R02529
R01635		R02537
R01636		R02549
R01649		R02556
R01650		R02559
R01654		R02568
R01657		R02604
R01658		R02639
R01659		R02657
R01669		R02673
R01670		R02680
R01680		R02703
R01683		R02706
R01689		R02711
R01690		R02728
R01694		R02777
R01695		R02856
R01703		R02866
R01707		R02894
R01709		R02900
R01718		R02923
R01721		R02930
R01722		R02933
R01723		R02939
R01732		R02978
R01754		R02984
R01766		R02988
R01767		R02991
R01784		R03005
R01806		R03035
R01807		R03044
R01808		R03099
R01812		R03134
R01813		R03139
R01814		R03158
R01837		R03181
R01839		R03182
R01840		R03184
R01841		R03227
R01844		R03246
R01850		R03256
R01861		R03302
R01877		R03314
R01887		R03328
R01890		R03338
R01893		R03339
R01898		R03508
R01906		R03583
R01910		R03638
R01912		R03696
R01921		R03792
R01922		R03794
R01923		R03855
R01926		R03883
R01928		R03942
R01929		R03966
R01930		R03988
R01932		R04025
R01941		R04027
R01944		R04047
R01945		R04048
R01946		R04065
R01951		R04129
R01963		R04144
R01971		R04180
R01972		R04186
R01973		R04199
R01974		R04200
R02003		R04201
R02004		R04209
R02006		R04210
R02007		R04221
R02009		R04229
R02010		R04248
R02013		R04295
R02037		R04300
R02047		R04325
R02061		R04326
R02063		R04340
R02064		R04383
R02065		R04439
R02066		R04518
R02068		R04557
R02075		R04591
R02076		R04682
R02077		R04752
R02078		R04788
R02081		R04882
R02082		R04919
R02083		R05051
R02084		R05071
R02113		R05254
R02118		R05268
R02119		R05291
R02123		R05293
R02125		R05334
R02129		R05349
R02136		R05354
R02139		R05395
R02144		R05432
R02148		R05433
R02152		R05436
R02155		R05438
R02156		R05481
R02157		R05513
R02158		R05571
R02159		R05594
R02160		R05622
R02171		R05641
R02172		R05679
R02173		R05684
R02174		R05686
R02177		R05694
R02178		R05695
R02179		R05696
R02195		R05697
R02207		R05698
R02208		R05701
R02209		R05702
R02210		R05705
R02219		R05707
R02220		R05711
R02221		R05715
R02226		R05717
R02227		R05724
R02229		R05732
R02231		R05735
R02232		R05736
R02233		R05737
R02238		R05738
R02244		R05805
R02245		R05842
R02255		R05861
R02256		R05862
R02264		R06154
R02265		RADD4
R02266		RADD5
R02267
R02268
R02271
R02284
R02293
R02298
R02299
R02303
R02305
R02307
R02311
R02318
R02336
R02338
R02345
R02347
R02349
R02351
R02354
R02355
R02356
R02358
R02359
R02370
R02373
R02375
R02376
R02377
R02379
R02380
R02381
R02384
R02385
R02387
R02388
R02389
R02395
R02396
R02397
R02398
R02408
R02414
R02416
R02426
R02428
R02430
R02431
R02436
R02442
R02443
R02444
R02445
R02446
R02447
R02449
R02453
R02462
R02463
R02467
R02468
R02469
R02470
R02471
R02476
R02477
R02478
R02481
R02482
R02484
R02486
R02499
R02500
R02501
R02502
R02504
R02505
R02506
R02509
R02512
R02513
R02528
R02532
R02533
R02534
R02535
R02539
R02547
R02548
R02551
R02552
R02553
R02554
R02558
R02561
R02562
R02563
R02564
R02565
R02566
R02567
R02574
R02575
R02576
R02580
R02581
R02583
R02587
R02590
R02593
R02600
R02605
R02606
R02607
R02609
R02610
R02611
R02618
R02619
R02632
R02633
R02636
R02644
R02648
R02666
R02667
R02670
R02672
R02677
R02678
R02681
R02683
R02684
R02699
R02700
R02701
R02702
R02708
R02709
R02710
R02714
R02715
R02720
R02723
R02733
R02741
R02742
R02750
R02771
R02772
R02774
R02776
R02782
R02785
R02786
R02792
R02793
R02798
R02799
R02800
R02801
R02805
R02807
R02810
R02813
R02815
R02817
R02821
R02825
R02830
R02831
R02832
R02834
R02836
R02837
R02839
R02840
R02841
R02842
R02844
R02846
R02852
R02853
R02857
R02858
R02859
R02861
R02862
R02863
R02864
R02869
R02872
R02874
R02875
R02877
R02878
R02880
R02882
R02891
R02892
R02893
R02895
R02896
R02897
R02898
R02899
R02901
R02902
R02906
R02907
R02908
R02909
R02910
R02911
R02913
R02915
R02916
R02919
R02920
R02921
R02925
R02926
R02931
R02932
R02937
R02938
R02940
R02941
R02942
R02943
R02944
R02945
R02946
R02947
R02948
R02951
R02952
R02954
R02962
R02967
R02968
R02969
R02970
R02971
R02972
R02973
R02974
R02975
R02982
R02983
R02985
R02986
R02992
R02993
R02994
R02995
R02997
R02998
R02999
R03006
R03007
R03008
R03009
R03021
R03022
R03023
R03024
R03030
R03032
R03040
R03049
R03052
R03053
R03054
R03055
R03056
R03057
R03058
R03063
R03065
R03068
R03069
R03070
R03073
R03075
R03077
R03080
R03081
R03089
R03091
R03092
R03093
R03094
R03095
R03096
R03097
R03104
R03105
R03112
R03113
R03114
R03119
R03123
R03124
R03125
R03126
R03130
R03131
R03132
R03133
R03138
R03142
R03144
R03145
R03146
R03148
R03155
R03161
R03165
R03166
R03168
R03169
R03176
R03194
R03195
R03197
R03198
R03199
R03200
R03202
R03203
R03207
R03208
R03209
R03211
R03213
R03214
R03216
R03220
R03222
R03225
R03228
R03229
R03230
R03234
R03241
R03245
R03252
R03261
R03263
R03264
R03265
R03266
R03268
R03271
R03275
R03277
R03278
R03279
R03280
R03281
R03283
R03284
R03289
R03290
R03292
R03297
R03298
R03304
R03306
R03308
R03310
R03311
R03315
R03317
R03318
R03319
R03322
R03323
R03324
R03325
R03329
R03330
R03333
R03342
R03344
R03345
R03349
R03352
R03357
R03359
R03365
R03367
R03371
R03372
R03373
R03374
R03375
R03378
R03380
R03384
R03385
R03386
R03388
R03390
R03391
R03392
R03393
R03394
R03395
R03396
R03397
R03398
R03399
R03401
R03402
R03403
R03404
R03406
R03407
R03408
R03419
R03420
R03421
R03427
R03431
R03448
R03451
R03452
R03453
R03456
R03461
R03462
R03463
R03464
R03465
R03466
R03477
R03479
R03493
R03494
R03495
R03496
R03497
R03498
R03499
R03500
R03502
R03506
R03507
R03511
R03512
R03517
R03518
R03520
R03521
R03523
R03530
R03535
R03537
R03538
R03541
R03542
R03543
R03546
R03547
R03548
R03556
R03558
R03563
R03564
R03565
R03567
R03568
R03570
R03571
R03572
R03573
R03574
R03576
R03577
R03578
R03579
R03580
R03581
R03586
R03587
R03588
R03589
R03590
R03591
R03592
R03594
R03596
R03601
R03607
R03610
R03612
R03614
R03615
R03616
R03620
R03621
R03622
R03623
R03624
R03625
R03626
R03627
R03628
R03630
R03631
R03633
R03636
R03639
R03640
R03641
R03642
R03667
R03668
R03669
R03671
R03672
R03673
R03674
R03675
R03677
R03680
R03685
R03688
R03689
R03690
R03691
R03692
R03694
R03700
R03701
R03702
R03710
R03712
R03713
R03716
R03719
R03721
R03722
R03723
R03724
R03725
R03726
R03727
R03728
R03730
R03731
R03732
R03733
R03735
R03736
R03737
R03738
R03745
R03746
R03747
R03753
R03759
R03761
R03766
R03770
R03773
R03775
R03778
R03779
R03780
R03781
R03782
R03785
R03787
R03796
R03799
R03800
R03801
R03802
R03808
R03809
R03810
R03811
R03812
R03819
R03820
R03821
R03822
R03823
R03824
R03826
R03827
R03831
R03832
R03833
R03834
R03835
R03842
R03847
R03848
R03859
R03860
R03861
R03863
R03864
R03866
R03867
R03877
R03878
R03879
R03880
R03881
R03884
R03885
R03886
R03894
R03897
R03899
R03900
R03903
R03906
R03908
R03918
R03929
R03930
R03934
R03935
R03939
R03943
R03945
R03946
R03948
R03952
R03953
R03954
R03960
R03962
R03963
R03964
R03965
R03969
R03970
R03971
R03972
R03974
R03975
R03976
R03977
R03982
R03991
R03994
R03997
R03998
R03999
R04002
R04003
R04004
R04010
R04013
R04020
R04021
R04024
R04028
R04030
R04033
R04038
R04040
R04049
R04050
R04056
R04057
R04059
R04060
R04067
R04068
R04077
R04084
R04091
R04093
R04094
R04099
R04100
R04103
R04105
R04106
R04108
R04112
R04115
R04116
R04117
R04119
R04127
R04130
R04135
R04136
R04137
R04139
R04140
R04141
R04147
R04148
R04151
R04153
R04154
R04158
R04161
R04163
R04164
R04165
R04166
R04167
R04169
R04170
R04171
R04177
R04178
R04202
R04205
R04206
R04211
R04213
R04218
R04222
R04234
R04235
R04236
R04237
R04247
R04255
R04256
R04262
R04263
R04264
R04265
R04266
R04270
R04271
R04276
R04285
R04286
R04296
R04297
R04301
R04304
R04305
R04307
R04309
R04310
R04317
R04324
R04328
R04330
R04333
R04334
R04335
R04337
R04338
R04342
R04344
R04345
R04346
R04347
R04349
R04350
R04351
R04352
R04353
R04354
R04356
R04359
R04367
R04370
R04372
R04373
R04374
R04378
R04382
R04384
R04387
R04388
R04391
R04397
R04398
R04400
R04402
R04405
R04409
R04410
R04412
R04421
R04423
R04427
R04436
R04438
R04446
R04447
R04451
R04460
R04467
R04476
R04478
R04479
R04481
R04483
R04486
R04487
R04490
R04492
R04498
R04505
R04506
R04507
R04510
R04512
R04515
R04520
R04521
R04525
R04526
R04527
R04529
R04531
R04532
R04538
R04540
R04541
R04547
R04552
R04565
R04570
R04572
R04573
R04576
R04577
R04579
R04580
R04592
R04593
R04594
R04597
R04598
R04599
R04600
R04601
R04602
R04605
R04608
R04609
R04618
R04619
R04622
R04623
R04641
R04666
R04667
R04669
R04671
R04674
R04675
R04676
R04678
R04680
R04683
R04686
R04687
R04688
R04690
R04691
R04692
R04694
R04695
R04696
R04697
R04699
R04702
R04703
R04705
R04706
R04707
R04708
R04709
R04711
R04713
R04714
R04715
R04723
R04728
R04734
R04736
R04737
R04738
R04740
R04741
R04742
R04743
R04744
R04745
R04746
R04747
R04748
R04749
R04756
R04757
R04758
R04759
R04760
R04762
R04763
R04768
R04770
R04771
R04772
R04776
R04777
R04778
R04783
R04784
R04786
R04789
R04792
R04793
R04798
R04799
R04801
R04802
R04803
R04804
R04805
R04807
R04809
R04810
R04811
R04812
R04813
R04817
R04818
R04819
R04823
R04824
R04825
R04826
R04827
R04828
R04829
R04830
R04831
R04832
R04833
R04834
R04835
R04836
R04837
R04838
R04839
R04840
R04842
R04843
R04844
R04845
R04846
R04847
R04849
R04850
R04851
R04853
R04854
R04855
R04858
R04872
R04876
R04877
R04880
R04881
R04884
R04885
R04887
R04888
R04889
R04890
R04891
R04892
R04893
R04894
R04900
R04901
R04902
R04903
R04904
R04905
R04907
R04908
R04909
R04911
R04914
R04915
R04928
R04929
R04930
R04936
R04945
R04946
R04971
R04972
R04973
R04975
R04978
R04979
R04980
R04981
R04982
R04983
R04984
R04986
R04987
R04988
R04989
R04990
R04992
R04996
R04998
R04999
R05027
R05028
R05030
R05033
R05035
R05036
R05037
R05038
R05039
R05040
R05043
R05055
R05056
R05057
R05058
R05059
R05060
R05061
R05062
R05077
R05078
R05079
R05083
R05084
R05086
R05087
R05092
R05097
R05099
R05100
R05104
R05119
R05120
R05121
R05122
R05123
R05124
R05125
R05128
R05130
R05133
R05134
R05135
R05137
R05141
R05142
R05147
R05148
R05149
R05150
R05154
R05155
R05156
R05157
R05158
R05160
R05161
R05162
R05165
R05166
R05168
R05174
R05176
R05177
R05180
R05181
R05200
R05202
R05203
R05207
R05208
R05210
R05211
R05212
R05213
R05214
R05215
R05216
R05218
R05219
R05221
R05222
R05223
R05224
R05230
R05232
R05233
R05234
R05235
R05237
R05238
R05239
R05240
R05241
R05243
R05245
R05247
R05248
R05252
R05255
R05256
R05257
R05258
R05261
R05262
R05265
R05266
R05267
R05269
R05271
R05272
R05275
R05276
R05277
R05278
R05279
R05281
R05282
R05284
R05285
R05286
R05287
R05288
R05289
R05294
R05295
R05298
R05299
R05300
R05302
R05303
R05305
R05308
R05309
R05310
R05311
R05312
R05314
R05315
R05317
R05319
R05321
R05322
R05323
R05326
R05328
R05330
R05331
R05341
R05347
R05348
R05355
R05356
R05357
R05359
R05360
R05361
R05363
R05364
R05365
R05367
R05368
R05369
R05370
R05371
R05372
R05373
R05375
R05376
R05377
R05380
R05381
R05382
R05383
R05386
R05387
R05388
R05390
R05391
R05392
R05393
R05394
R05397
R05399
R05400
R05401
R05402
R05403
R05407
R05409
R05410
R05411
R05412
R05413
R05414
R05415
R05418
R05419
R05420
R05422
R05423
R05426
R05427
R05428
R05429
R05434
R05439
R05441
R05442
R05443
R05444
R05446
R05447
R05448
R05449
R05451
R05452
R05453
R05454
R05455
R05456
R05457
R05459
R05466
R05467
R05468
R05469
R05471
R05475
R05483
R05484
R05485
R05492
R05493
R05498
R05499
R05506
R05507
R05510
R05511
R05515
R05516
R05517
R05519
R05525
R05526
R05527
R05529
R05530
R05531
R05532
R05533
R05534
R05535
R05536
R05538
R05540
R05541
R05542
R05543
R05544
R05546
R05547
R05555
R05558
R05559
R05560
R05561
R05566
R05569
R05572
R05573
R05574
R05582
R05586
R05592
R05597
R05600
R05601
R05603
R05604
R05609
R05610
R05612
R05613
R05618
R05619
R05620
R05626
R05628
R05629
R05632
R05633
R05634
R05636
R05637
R05639
R05642
R05643
R05644
R05648
R05649
R05650
R05653
R05658
R05662
R05665
R05668
R05672
R05673
R05674
R05676
R05677
R05678
R05681
R05687
R05688
R05713
R05718
R05719
R05720
R05721
R05722
R05727
R05746
R05749
R05750
R05754
R05757
R05758
R05760
R05763
R05764
R05765
R05766
R05768
R05769
R05770
R05771
R05775
R05776
R05778
R05779
R05780
R05781
R05783
R05784
R05789
R05790
R05791
R05799
R05807
R05808
R05809
R05810
R05811
R05812
R05813
R05814
R05815
R05822
R05824
R05825
R05826
R05827
R05829
R05830
R05832
R05836
R05841
R05844
R05845
R05846
R05847
R05848
R05849
R05852
R05855
R05856
R05857
R05858
R05863
R05866
R05870
R05873
R05874
R05876
R05877
R05878
R05879
R05880
R05881
R05885
R06047
R06048
R06065
R06117
R06119
R06120
R06126
R06139
R06146
R06159
R06166
R06171
